# Supplementary material for: Pre-existing anti-polyethylene glycol antibody reduces the therapeutic efficacy and pharmacokinetics of PEGylated liposomes
Source: PubMed Central journal article supplement — Theranostics. 2018 May 9;8(11):3164–75. doi: 10.7150/thno.22164 (PMC5996368; doi:10.7150/thno.22164), 2018-05-09
Supplement: thnov08p3164s1.pdf [file thnov08p3164s1.pdf]

(A)

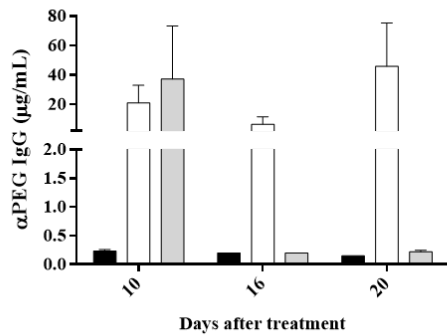

(B)

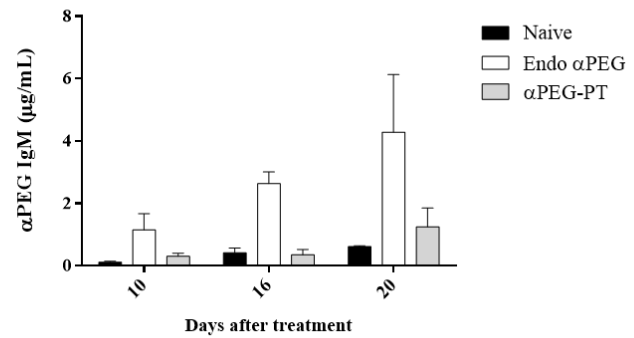

**Supplementary Figure S1. The concentration of  $\alpha$ PEG Ab with repeated injection of LipoDox *in vivo*.**

The Naive (black), Endo  $\alpha$ PEG (white) and  $\alpha$ PEG-PT (gray) BALB/c mice were IV injected with LipoDox. The blood samples were harvested at different time points and the concentration of  $\alpha$ PEG Ab were analyzed by  $\alpha$ PEG quantitative ELISA. Data represents mean  $\pm$  SD.

[Please note that supplementary material is not copy-edited. Authors are responsible for ensuring all supplementary material meets the scientific and style standards of the main text and figures.]
